# Supplementary material for: Cannabinoid Receptor 2 Alters Social Memory and Microglial Activity in an Age-Dependent Manner
Source: MDPI journal article supplement (doi:10.3390/molecules26195984), 2021-10-02
Supplement: s1 [file s1]

## Supplementary Material

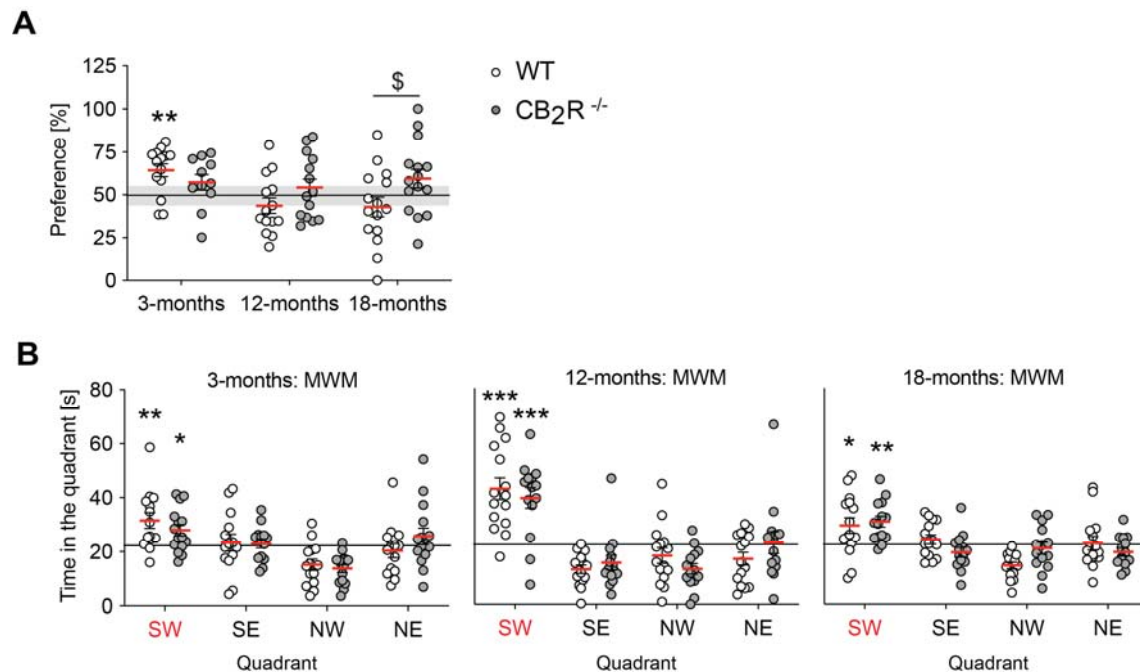

**Supplementary Figure S1: Memory** (A) Preference for the novel partner (after 30 minutes separation) was calculated as time with the novel partner mouse over total interaction time. Each group was analysed individually by one-sample t-test (hypothetical mean = 50). Significant difference from the 50 % chance level indicated learning with  $**p < 0.01$ . Each point represents a single mouse. Red line indicates the mean value  $\pm$  SEM. Line indicates a 50 % chance level. Grey box indicates 5 % variance around the chance level. Two-way ANOVA followed by Sidak's multiple comparison test with \$  $p < 0.05$  significance between genotypes within the same age group. (B) Probe trial of the MWM. Panels from left to right: 3-, 12- and 18-months old mice. Each group was analysed individually by one-sample t-test (hypothetical mean = 22.5). Line indicates a 22.5 s chance level with total swim time 90 s. Quadrant in which the platform was localized (SW) indicated in red. SW - southwest; SE - southeast; NW - northwest; NE - northeast. Significant difference from the 22.5 s chance level indicated intact memory recall with  $p < 0.05$ ;  $**p < 0.01$ ;  $***p < 0.001$

WT mice – white circle; CB<sub>2</sub>R<sup>-/-</sup> mice – grey circles. N=14-15 mice / genotype / age group.

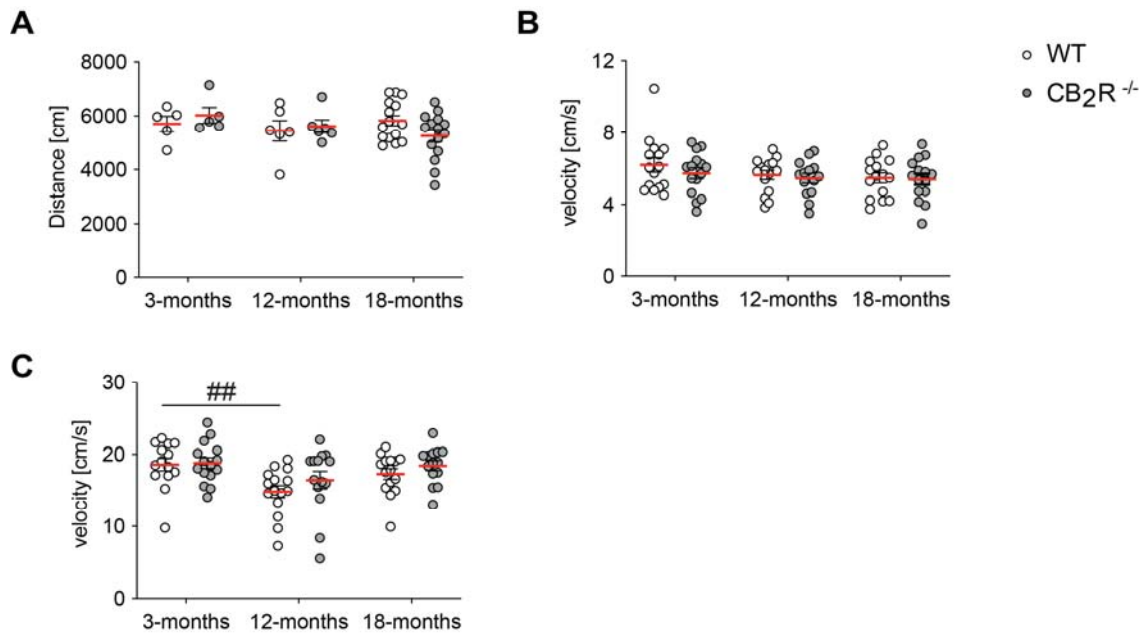

**Supplementary Figure S2: Motility** (A) Total distance travelled during open-field like test (habituation of the PR test, 10-minute free exploration of the open-field box). (B) Mice velocity during trial 1 of the PR test. (C) Mice velocity during probe trail of the MWM test. Two-way ANOVA followed by Sidak's multiple comparison test with ## $p < 0.01$  significance between age groups within the same genotype. WT mice – white circle; CB<sub>2</sub>R<sup>-/-</sup> mice – grey circles. N=5-15 mice / genotype / age group.

**Supplementary Table S1.** Statistical analysis.

|                                                                           |                                        | Statistical test                           |                                                                                                                                                                                              | Posthoc test                      |                                                                                                                                                                                                                                                                                                                   |
|---------------------------------------------------------------------------|----------------------------------------|--------------------------------------------|----------------------------------------------------------------------------------------------------------------------------------------------------------------------------------------------|-----------------------------------|-------------------------------------------------------------------------------------------------------------------------------------------------------------------------------------------------------------------------------------------------------------------------------------------------------------------|
| Figure                                                                    | Panel                                  | Test name                                  | result                                                                                                                                                                                       | Test name                         | result                                                                                                                                                                                                                                                                                                            |
| <b>1. CB2R deletion has a moderate age-dependent effect on cognition.</b> | <b>1b:</b> Sociability (30 min)        | one-sample t-test (hypothetical mean = 50) | <b>all groups</b> $p < 0.0001$                                                                                                                                                               |                                   |                                                                                                                                                                                                                                                                                                                   |
|                                                                           |                                        | two-way ANOVA                              | Interaction age x genotype $F(2, 71) = 0.8353$ , $p = 0.4379$ ; age $F(2, 71) = 1.018$ , $p = 0.3664$ ; genotype $F(1, 71) = 1.041$ , $p = 0.3111$                                           |                                   |                                                                                                                                                                                                                                                                                                                   |
|                                                                           | <b>1c:</b> Novelty preference (30 min) | one-sample t-test (hypothetical mean = 50) | <b>3-month WT</b> $p = 0.0468$ , <b>CB2R-/-</b> $p = 0.9620$ ; <b>12-month WT</b> $p = 0.0035$ , <b>CB2R-/-</b> $p = 0.0906$ ; <b>18-month WT</b> $p = 0.7849$ , <b>CB2R-/-</b> $p = 0.0472$ |                                   |                                                                                                                                                                                                                                                                                                                   |
|                                                                           |                                        | two-way ANOVA                              | age x genotype $F(2, 71) = 3.560$ ; $p = 0.0336$ ; age $F(2, 71) = 1.136$ , $p = 0.3270$ ; genotype $F(1, 71) = 0.7894$ , $p = 0.3773$                                                       | Šídák's multiple comparisons test | <b>WT</b> 3-month vs 18-month $p = 0.0391$                                                                                                                                                                                                                                                                        |
|                                                                           | <b>1d:</b> 3-month old (Acquisition)   | two-way RM Anova                           | interaction time x genotype $F(5, 135) = 0.6925$ ; $p = 0.6300$ ; time $F(5, 135) = 12.29$ ; $p < 0.0001$ ; genotype $F(1, 27) = 0.0006$ ; $p = 0.9800$                                      | Šídák's multiple comparisons test | <b>WT</b> Day 1 vs Day 4 $p = 0.0245$ ; Day 1 vs Day 6 $p = 0.0010$ ; Day 2 vs Day 4 $p = 0.0427$ ; Day 2 vs Day 6 $p = 0.0019$ ; <b>CB2R-/-</b> Day 1 vs Day 4 $p = 0.0047$ ; Day 1 vs Day 5 $p = 0.0001$ ; Day 1 vs Day 6 $p < 0.0001$ ; Day 2 vs Day 6 $p = 0.0213$                                            |
|                                                                           | <b>1d:</b> 3-month old (Reversal)      | two-way RM Anova                           | interaction time x genotype $F(2, 54) = 0.711$ ; $p = 0.4957$ ; time $F(2, 54) = 8.366$ ; $p = 0.0007$ ; genotype $F(1, 27) = 0.1297$ ; $p = 0.7215$                                         | Šídák's multiple comparisons test | <b>CB2R-/-</b> Day 8 vs Day 9 $p = 0.0124$ ; Day 8 vs Day 10 $p = 0.0024$                                                                                                                                                                                                                                         |
|                                                                           | <b>1d:</b> 12-month old (Acquisition)  | two-way RM Anova                           | interaction time x genotype $F(5, 135) = 2.06$ ; $p = 0.0743$ ; time $F(5, 135) = 33.06$ ; $p < 0.0001$ ; genotype $F(1, 27) = 0.0017$ ; $p = 0.8950$                                        | Šídák's multiple comparisons test | <b>WT</b> Day 1 vs Day 2/3/4/5/6 $p < 0.0001$ ; Day 2 vs Day 5 $p = 0.0255$ ; Day 2 vs Day 6 $p = 0.420$ ; <b>CB2R-/-</b> Day 1 vs Day 3 $p = 0.0027$ ; Day 1 vs Day 4/5/6 $p < 0.0001$ ; Day 2 vs Day 3 $p = 0.0269$ ; Day 2 vs Day 4 $p = 0.0006$ ; Day 2 vs Day 5/6 $p < 0.0001$ ; Day 3 vs Day 6 $p = 0.0310$ |
|                                                                           | <b>1d:</b> 12-month old (Reversal)     | two-way RM Anova                           | interaction time x genotype $F(2, 54) = 3.92$ ; $p = 0.0257$ ; time $F(2, 54) = 20.04$ ; $p < 0.0001$ ; genotype $F(1, 27) = 1.299$ ; $p = 0.2644$                                           | Šídák's multiple comparisons test | <b>Day 9 WT vs CB2R-/-</b> $p = 0.0610$ ; <b>WT</b> Day 8 vs Day 9/10 $p < 0.0001$ ; <b>CB2R-/-</b> Day 8 vs Day 10 $p = 0.0072$ ; Day 9 vs Day 10 $p = 0.0402$                                                                                                                                                   |

|                                                                                                |                                               | Statistical test |                                                                                                                                    | Posthoc test                      |                                                                                                                                                                                                                              |
|------------------------------------------------------------------------------------------------|-----------------------------------------------|------------------|------------------------------------------------------------------------------------------------------------------------------------|-----------------------------------|------------------------------------------------------------------------------------------------------------------------------------------------------------------------------------------------------------------------------|
| Figure                                                                                         | Panel                                         | Test name        | result                                                                                                                             | Test name                         | result                                                                                                                                                                                                                       |
|                                                                                                | 1d: 18-month old (Acquisition)                | two-way RM Anova | interaction time x genotype F(5, 135)= 1.081; p = 0.3739; time F(5,135) = 31.62; p< 0.0001; genotype F(1,27)= 0.907; p = 0.3494    | Šídák's multiple comparisons test | WT Day 1 vs Day 2 p = 0.0080; Day 1 vs Day 3/4/5/6 p < 0.0001; Day 2 vs Day 5 p = 0.0412; Day 2 vs Day 6 p = 0.0003; <b>CB2R-/-</b> Day 1 vs Day 2/3/4/5/6 p< 0.0001                                                         |
|                                                                                                | 1d: 18-month old (Reversal)                   | two-way RM Anova | interaction time x genotype F(2, 54)= 1.936; p = 0.1541; time F(2, 54)= 12.82; p < 0.0001; genotype F(1, 27) = 0.07016; p = 0.7931 | Šídák's multiple comparisons test | <b>CB2R-/-</b> Day 8 vs Day 9 p= 0.0113, Day 8 vs Day 10 p< 0.0001                                                                                                                                                           |
| 2. CB2R deletion results in a decreased anxiety phenotype in o-maze                            | 2a: % of time spent in the open compartment   | two-way ANOVA    | Interaction age x genotype F(2, 82) = 0.3559, p = 0.7016; age F(2, 82) = 10.26; p = 0.0001; genotype F(1, 82) = 4.427; p = 0.0384  | Šídák's multiple comparisons test | WT 3-months vs 18-months p= 0.0026; <b>CB2R-/-</b> 3-months vs 12-months p= 0.0372, 3-months vs 18-months p= 0.0306                                                                                                          |
|                                                                                                | 2b: Distance traveled in the open compartment | two-way ANOVA    | Interaction age x genotype F(2, 82) = 0.5281, p= 0.5917; age F(2,82) = 17; p < 0.0001; genotypeF(1,82) = 7.009, p= 0.0097          | Šídák's multiple comparisons test | WT 3-months vs 18-months p= 0.0004; <b>CB2R-/-</b> 3-months vs 12-months p= 0.0012, 3-months vs 18-months p= 0.0007                                                                                                          |
|                                                                                                | 2c: Number of stretched posture behaviours    | two-way ANOVA    | Interaction age x genotype F(2, 82) = 3.004, p = 0.0552, age F(2, 81) = 4.152; p= 0.0192; genotype F(1, 81) = 13.24; p = 0.0005    | Šídák's multiple comparisons test | WT vs <b>CB2R-/-</b> 3-months p= 0.0071, WT vs <b>CB2R-/-</b> 18-months p= 0.0072; <b>CB2R-/-</b> 12-month vs 18-months p =0.0083                                                                                            |
|                                                                                                | 2d: Number of looking down behaviors          | two-way ANOVA    | Interaction age x genotype F(2, 81) = 0.6890, p = 0.5050, age F(2, 81) = 2.702; p =0.0731, genotype F(1, 81) = 33.24; p < 0.0001   | Šídák's multiple comparisons test | WT vs <b>CB2R-/-</b> 3-months p= 0.0039, WT vs <b>CB2R-/-</b> 12-months p= 0.0451; WT vs <b>CB2R-/-</b> 18-months p= 0.0002                                                                                                  |
| 3. Accumulation of Lipofuscin in pyramidal neurons during aging is not altered by CB2 deletion | 3b: Area covered                              | two-way ANOVA    | interaction, genotype x age F(2,66)= 0.4423; p = 0.6445; age F(2,66)= 81.41; p < 0.0001; genotypeF(1,66)= 0.5129; p = 0.4764       | Šídák's multiple comparisons test | WT 3-months vs 12-months p = 0.0001, 3-months vs 18-months p < 0.0001, 12-months vs 18-months p < 0.0001; <b>CB2R-/-</b> 3-months vs 12-months p < 0.0001, 3-months vs 18-months p < 0.0001, 12-month vs 18-month p = 0.0034 |
|                                                                                                | 3c: Particle density                          | two-way ANOVA    | interaction genotype x age F(2, 65) = 0.7953; p = 0.4558; age F(2, 65) = 82.98; p< 0.0001; genotype F(1, 65) = 1.269; p = 0.2641   | Šídák's multiple comparisons test | WT 3-months vs 12-months p < 0.0001; 3-months vs 18-months p < 0.0001; 12-months vs 18-months p = 0.0010; <b>CB2R-/-</b> 3-months vs 12-months p < 0.0001; 3-months vs 18-months p<0.0001; 12-months vs 18-months p = 0.0527 |

|                                                                               |                                     | Statistical test |                                                                                                                                                      | Posthoc test                      |                                                                                                                                                                                                                                                                       |
|-------------------------------------------------------------------------------|-------------------------------------|------------------|------------------------------------------------------------------------------------------------------------------------------------------------------|-----------------------------------|-----------------------------------------------------------------------------------------------------------------------------------------------------------------------------------------------------------------------------------------------------------------------|
| Figure                                                                        | Panel                               | Test name        | result                                                                                                                                               | Test name                         | result                                                                                                                                                                                                                                                                |
| 4.<br>Accumulation of Lipofuscin in microglia is increased after CB2 deletion | 4b: Area covered                    | two-way ANOVA    | interaction genotype x age $F(2, 419) = 7.514$ ; $p = 0.0006$ ; age $F(2, 419) = 47.06$ ; $p < 0.0001$ ; genotype $F(1, 419) = 7.857$ ; $p = 0.0053$ | Šídák's multiple comparisons test | <b>WT vs CB2R-/- 12 months</b> $p < 0.0001$ ; <b>WT 3-months vs 18-months</b> $p < 0.0001$ , 12-months vs 18-months $p < 0.0001$ ; <b>CB2R-/- 3-months vs 12-months</b> $p < 0.0001$ , 3-months vs 18-months $p < 0.0001$                                             |
|                                                                               | 4c: Particle density                | two-way ANOVA    | interaction genotype x age $F(2, 429) = 1.085$ ; $p = 0.3388$ ; age $F(2, 429) = 48.34$ ; $p < 0.0001$ ; genotype $F(1, 419) = 3.209$ ; $p = 0.0740$ | Šídák's multiple comparisons test | <b>WT 3-months vs 12-months</b> $p < 0.0001$ , 3-months vs 18-months $p < 0.0001$ ; <b>CB2R-/- 3-months vs 12-months</b> $p < 0.0001$ ; 3-months vs 18-months $p < 0.0001$ ; 12-months vs 18-months $p = 0.0385$                                                      |
| 5. Iba1 and CD68 intensity is enhanced in CB2-/- microglia                    | 5b: Iba1 mean grey value            | two-way ANOVA    | interaction genotype x age $F(2, 345) = 3.525$ ; $p = 0.0305$ ; age $F(2, 345) = 11.43$ ; $p < 0.0001$ ; genotype $F(1, 345) = 36.48$ ; $p < 0.0001$ | Šídák's multiple comparisons test | <b>WT vs CB2R-/- 3 months</b> $p < 0.0001$ ; <b>WT vs CB2R-/- 18 months</b> $p < 0.0001$ ; <b>WT 3-months vs 18-months</b> $p < 0.0001$ , 3-months vs 18-months $p = 0.0465$ ; 3-months vs 18-months $p = 0.0511$ ; <b>CB2R-/- 3-months vs 18-months</b> $p = 0.0373$ |
|                                                                               | 5c: % of soma covered by CD68       | two-way ANOVA    | interaction genotype x age $F(2, 334) = 2.424$ ; $p = 0.0901$ ; age $F(2, 334) = 18.11$ ; $p < 0.0001$ ; genotype $F(1, 334) = 2.794$ ; $p = 0.0956$ | Šídák's multiple comparisons test | <b>WT vs CB2R-/- 18 months</b> $p = 0.0342$ ; <b>WT 3-months vs 12-months</b> $p < 0.0001$ , 3-months vs 18-months $p = 0.0347$ ; <b>CB2R-/- 3-months vs 12-months</b> $p = 0.0046$ ; 3-months vs 18-months $p < 0.0001$                                              |
| 6. Age-dependent alteration in expression of inflammatory mediators.          | 6a: <i>tnfa</i> relative expression | two-way ANOVA    | interaction genotype x age $F(2, 28) = 2.191$ ; $p = 0.1306$ ; age $F(2, 28) = 7.804$ ; $p = 0.002$ ; genotype $F(1, 28) = 3.673$ ; $p = 0.0656$     | Šídák's multiple comparisons test | <b>CB2R-/- 3-month vs 12-month</b> $p = 0.0095$ , 3-month vs 18-month $p = 0.0022$                                                                                                                                                                                    |
|                                                                               | 6b: <i>il-6</i> relative expression | two-way ANOVA    | interaction genotype x age $F(2, 28) = 1.152$ ; $p = 0.3304$ ; age $F(2, 28) = 15.08$ ; $p < 0.0001$ ; genotype $F(1, 28) = 1.089$ ; $p = 0.3057$    | Šídák's multiple comparisons test | <b>WT 3-month vs 12-month</b> $p = 0.0025$ ; 12-month vs 18-month $p = 0.0052$ ; <b>CB2R-/- 3-month vs 12-month</b> $p = 0.0018$                                                                                                                                      |
|                                                                               | 6a: <i>ccl2</i> relative expression | two-way ANOVA    | interaction genotype x age $F(2, 29) = 4.738$ ; $p = 0.0166$ ; age $F(2, 29) = 12.29$ ; $p = 0.0001$ ; genotype $F(1, 29) = 0.5880$ ; $p = 0.4494$   | Šídák's multiple comparisons test | <b>WT vs CB2R-/-</b> $p = 0.0266$ ; <b>WT 3-month vs 18-month</b> $p < 0.0001$ , 12-month vs 18-month $p = 0.0001$                                                                                                                                                    |
|                                                                               | 6b: <i>arg1</i> relative expression | two-way ANOVA    | interaction genotype x age $F(2, 30) = 0.3524$ ; $p = 0.7059$ ; age $F(2, 28) = 1.803$ ; $p = 0.1823$ ; genotype $F(1, 30) = 0.0531$ ; $p = 0.8193$  |                                   |                                                                                                                                                                                                                                                                       |

|                                                       |                                                                          | Statistical test                                |                                                                                                                                                                             | Posthoc test                      |                                                                                                                                                                                                                 |
|-------------------------------------------------------|--------------------------------------------------------------------------|-------------------------------------------------|-----------------------------------------------------------------------------------------------------------------------------------------------------------------------------|-----------------------------------|-----------------------------------------------------------------------------------------------------------------------------------------------------------------------------------------------------------------|
| Figure                                                | Panel                                                                    | Test name                                       | result                                                                                                                                                                      | Test name                         | result                                                                                                                                                                                                          |
|                                                       | <b>6b:</b> <i>nos2</i> relative expression                               | two-way ANOVA                                   | interaction genotype x age<br>F(2,26) = 0.08149; p = 0.9220;<br>age F(2,26) = 4.275; p = 0.0248;<br>genotype F(1,26) = 0.5170; p = 0.4785                                   | Šídák's multiple comparisons test | -                                                                                                                                                                                                               |
| <b>7. CB2R deletion changes microglial morphology</b> | <b>7b:</b> Soma size                                                     | two-way ANOVA                                   | interaction genotype x age<br>F(2,1000) = 1.786; p = 0.1681;<br>age F(2,1000) = 22.97; p < 0.0001; genotype F(1,1000) = 15.99; p < 0.0001                                   | Šídák's multiple comparisons test | <b>WT vs CB2R-/- 18 months</b> p = 0.0006;<br><b>WT</b> 3-months vs 18-months p < 0.0001, 12-months vs 18-months p < 0.0001; <b>CB2R-/-</b> 3-months vs 18-months p = 0.0276; 12-months vs 18-months p = 0.0029 |
|                                                       | <b>7c:</b> Volume                                                        | two-way ANOVA                                   | interaction genotype x age<br>F(2,316) = 0.1823; p = 0.8334;<br>age F(2,316) = 1.076; p = 0.3422;<br>genotype F(1,316) = 11.6; p = 0.0007                                   | Šídák's multiple comparisons test | <b>WT vs CB2R-/- 3 months</b> p = 0.0462                                                                                                                                                                        |
|                                                       | <b>7d:</b> Ramification index                                            | two-way ANOVA                                   | interaction genotype x age<br>F(2,317) = 0.4927; p = 0.6114; age<br>F(2,317) = 1.279; p = 0.2797;<br>genotype F(1,317) = 15.18; p = 0.0001                                  | Šídák's multiple comparisons test | <b>WT vs CB2R-/- 3 months</b> p = 0.0101                                                                                                                                                                        |
|                                                       | <b>7e:</b> Polarity index                                                | two-way ANOVA                                   | interaction genotype x age<br>F(2,340) = 0.09658; p = 0.9080;<br>age F(2,340) = 2.283; p = 0.1035;<br>genotype F(1,340) = 15.27; p = 0.0001                                 | Šídák's multiple comparisons test | <b>WT vs CB2R-/- 3 months</b> p = 0.0298                                                                                                                                                                        |
|                                                       | <b>7f:</b> Tree length                                                   | two-way ANOVA                                   | interaction genotype x age<br>F(2,329) = 1.426; p = 0.2418; age<br>F(2,329) = 0.4238; p = 0.6549;<br>genotype F(1,329) = 13.02; p = 0.0004                                  | Šídák's multiple comparisons test | <b>WT vs CB2R-/- 3 months</b> p = 0.0025                                                                                                                                                                        |
|                                                       | <b>7g:</b> Average branch length                                         | two-way ANOVA                                   | interaction genotype x age<br>F(2,326) = 3.519; p = 0.0308; age<br>F(2,326) = 1.295; p = 0.2754;<br>genotype F(1,326) = 5.847; p = 0.0161                                   | Šídák's multiple comparisons test | <b>WT vs CB2R-/- 18 months</b> p = 0.0054;<br><b>CB2R-/-</b> 12-months vs 18-months p = 0.0187                                                                                                                  |
| <b>S1. Memory</b>                                     | <b>S1a:</b> Novelty preference (1h)                                      | one-sample t-test<br>(hypothetical mean = 50)   | <b>3-month WT</b> p = 0.0021                                                                                                                                                |                                   |                                                                                                                                                                                                                 |
|                                                       | <b>S1a:</b> Novelty preference (1h)                                      | two-way ANOVA                                   | age x genotype F(2,77) = 2.910; p = 0.0605; age F(2,77) = 3.041; p = 0.0535                                                                                                 | Šídák's multiple comparisons test | <b>WT vs CB2R-/- 18-months</b> p = 0.0483                                                                                                                                                                       |
|                                                       | <b>1b:</b> MWM probe trial (preference for platform-associated quadrant) | one-sample t-test<br>(hypothetical mean = 22.5) | <b>3-month WT</b> p = 0.0088, <b>CB2R-/-</b> p = 0.0219; <b>12-month WT</b> p = 0.0002, <b>CB2R-/-</b> p = 0.0008; <b>18-month WT</b> p = 0.0421, <b>CB2R-/-</b> p = 0.0018 |                                   |                                                                                                                                                                                                                 |
| <b>S2. Motility</b>                                   | <b>S2a:</b> Distance: open-field like test                               | two-way ANOVA                                   | interaction genotype x age<br>F(2,46) = 1.743; p = 0.1864; age<br>F(2,46) = 0.7420; p = 0.4818;<br>genotype F(1,46) = 0.01203; p = 0.9131                                   |                                   |                                                                                                                                                                                                                 |

|        |                            | Statistical test |                                                                                                                                                           | Posthoc test |                                              |
|--------|----------------------------|------------------|-----------------------------------------------------------------------------------------------------------------------------------------------------------|--------------|----------------------------------------------|
| Figure | Panel                      | Test name        | result                                                                                                                                                    | Test name    | result                                       |
|        | S2a: Velocity:<br>PR test  | two-way<br>ANOVA | interaction genotype x age<br>$F(2,83) = 0.2221$ ; $p = 0.8013$ ; age<br>$F(2,83) = 1.701$ ; $p = 0.1888$ ;<br>genotype $F(1,83) = 0.9010$ ; $p = 0.3453$ |              |                                              |
|        | S2c: Velocity:<br>MWM test | two-way<br>ANOVA | interaction genotype x age<br>$F(2,81) = 0.3312$ ; $p = 0.7190$ ; age<br>$F(2,81) = 6.678$ ; $p = 0.0021$ ;<br>genotype $F(1,81) = 1.954$ ; $p = 0.1660$  |              | <b>WT</b> 3-months vs 12-months $p = 0.0083$ |
